# Supplementary material for: Methane and carbon dioxide emissions from 40 lakes along a north–south latitudinal transect in Alaska
Source: Copernicus journal article supplement (doi:10.5194/bg-12-3197-2015), 2015-06-02

Supplement of Biogeosciences, 12, 3197–3223, 2015  
<http://www.biogeosciences.net/12/3197/2015/>  
doi:10.5194/bg-12-3197-2015-supplement  
© Author(s) 2015. CC Attribution 3.0 License.

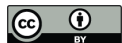

*Supplement of*

## **Methane and carbon dioxide emissions from 40 lakes along a north–south latitudinal transect in Alaska**

**A. Sepulveda-Jauregui et al.**

*Correspondence to:* K. M. Walter Anthony ([kwalteranthony@alaska.edu](mailto:kwalteranthony@alaska.edu))

The copyright of individual parts of the supplement might differ from the CC-BY 3.0 licence.

Figure S1. Temperature (solid lines) and dissolved oxygen (dashed lines) profiles measured in study lakes in 2009, 2011 and 2012. Data from 2011 and 2012 at locations specific to the contemporary dissolved gas and other physicochemical measurements were used in our analysis. We have included additional temperature and dissolved oxygen data from other sites in the study lakes in 2009 and 2011, which give an indication of spatiotemporal variability in the lakes. If more than one site within a lake was measured on the same date, sites are distinguished in the key. Summer data are shown as warm colors (pink, red, orange); winter data are blue. We used \* to indicate instances where data from the dissolved oxygen probe are not available at the lake bottom.

.

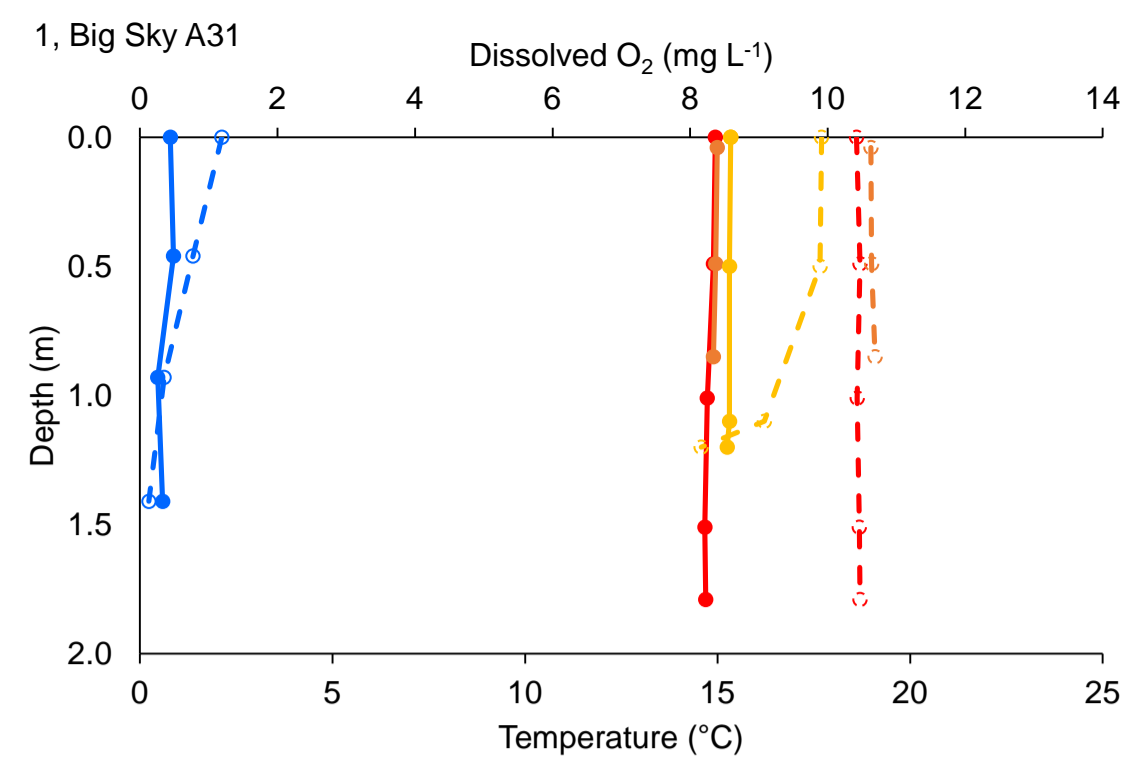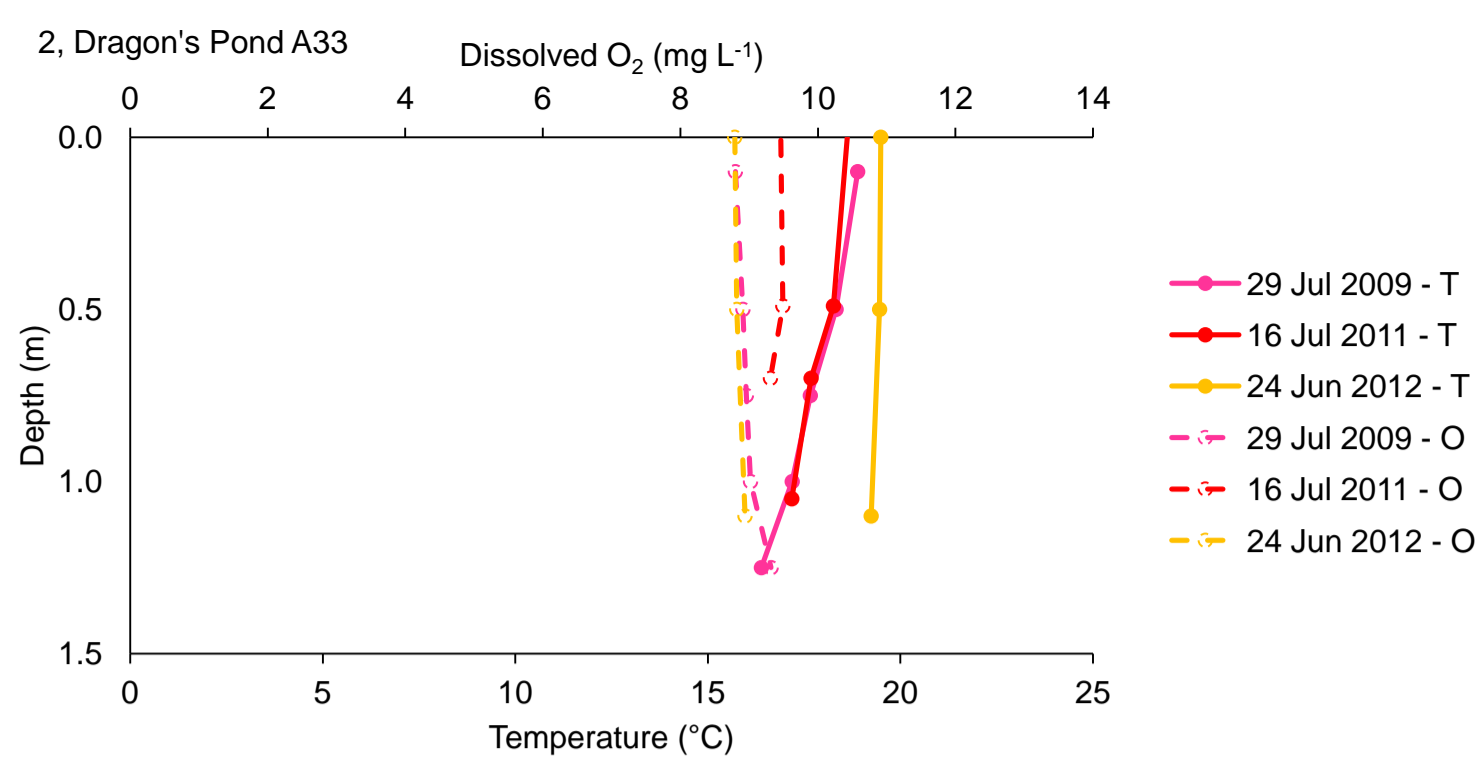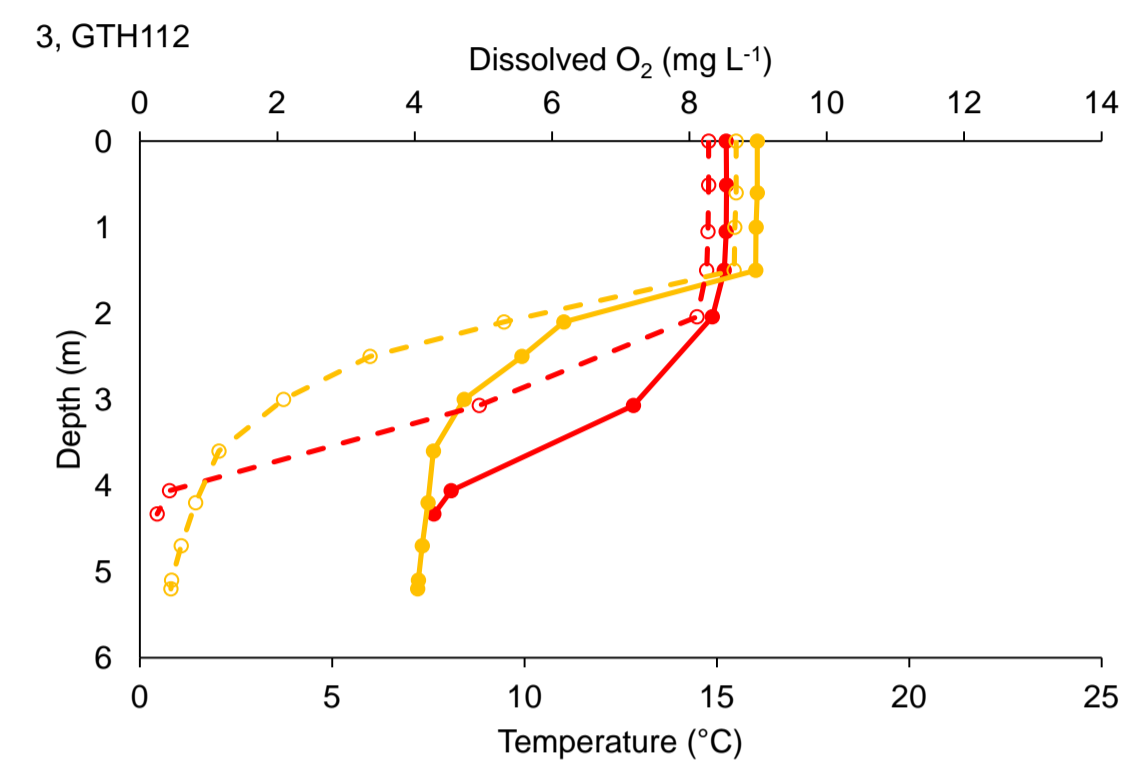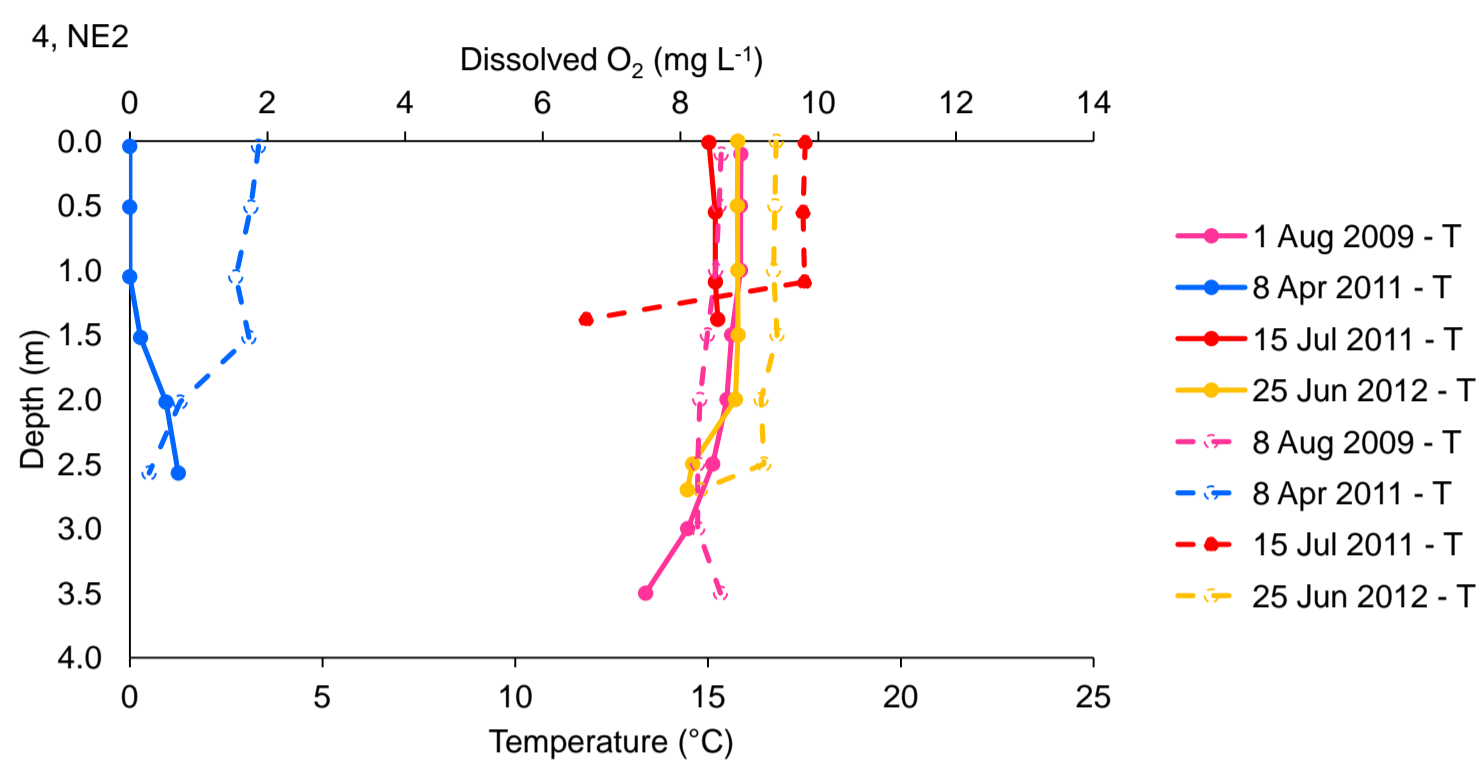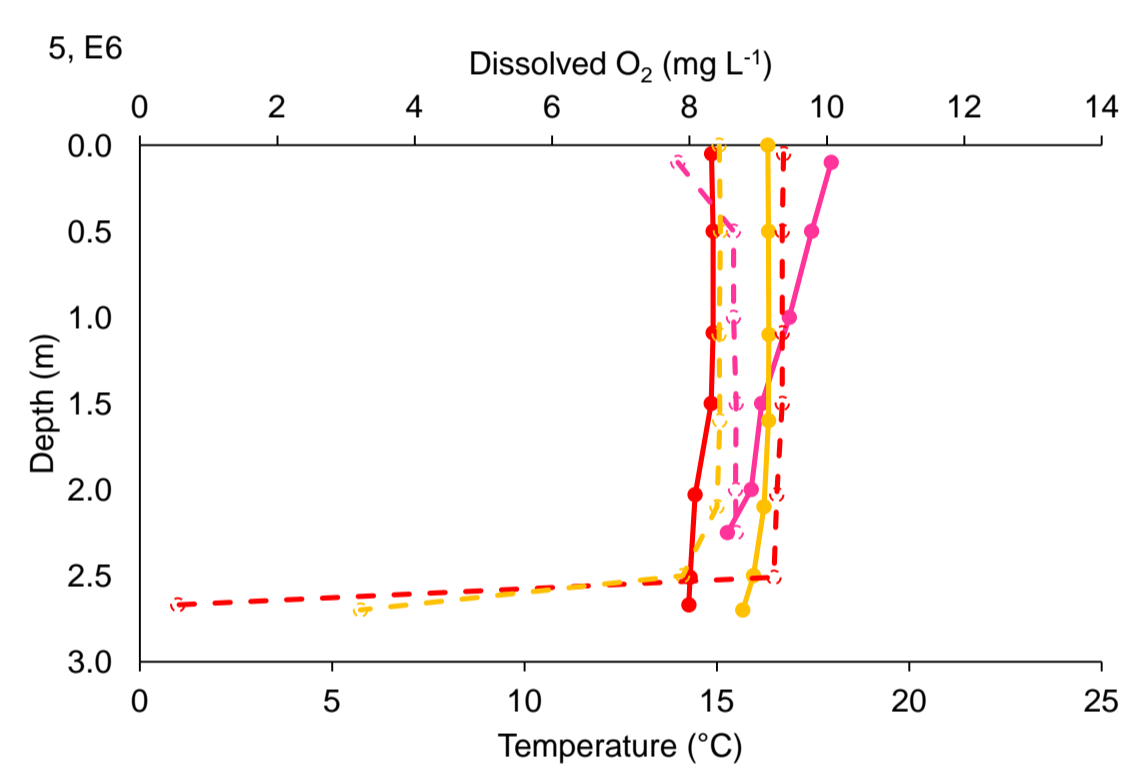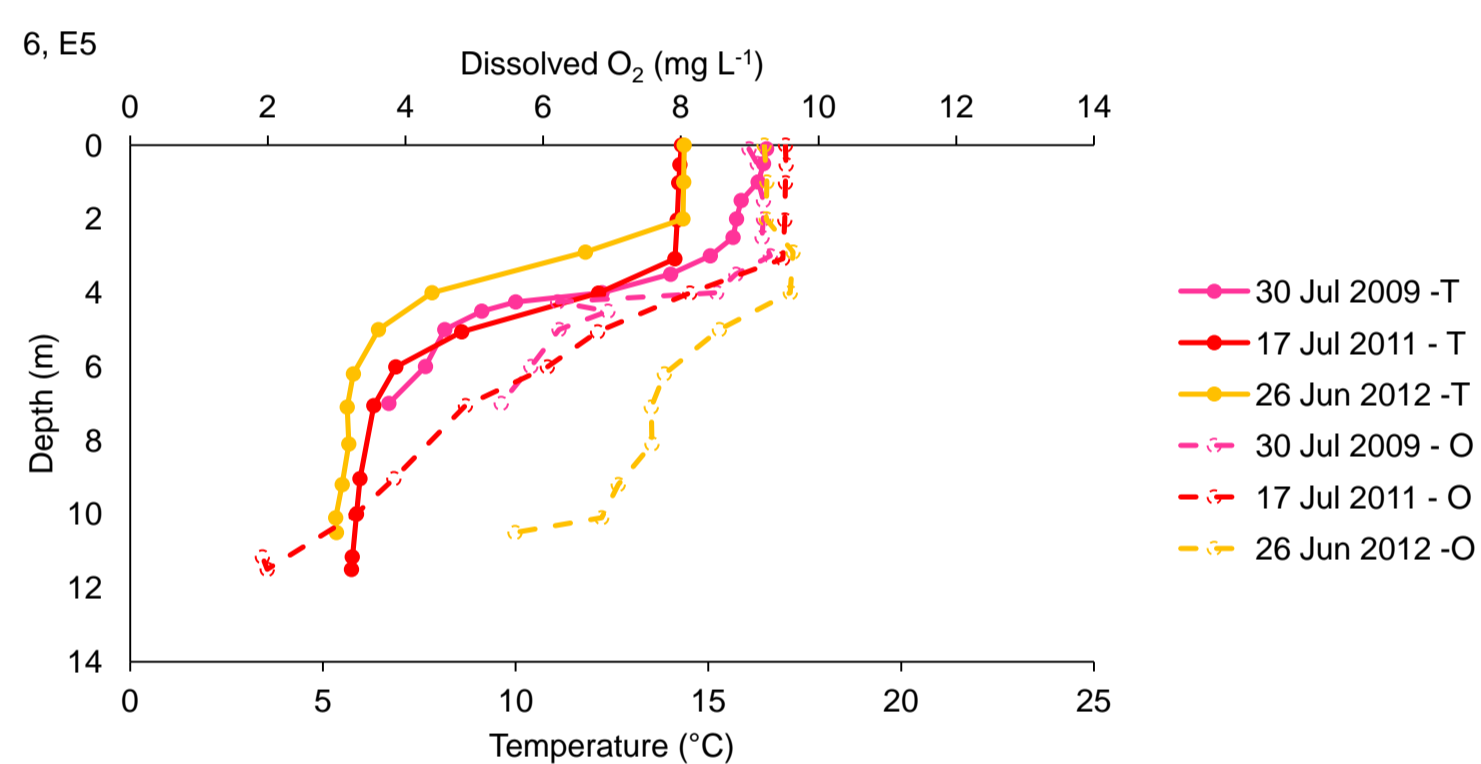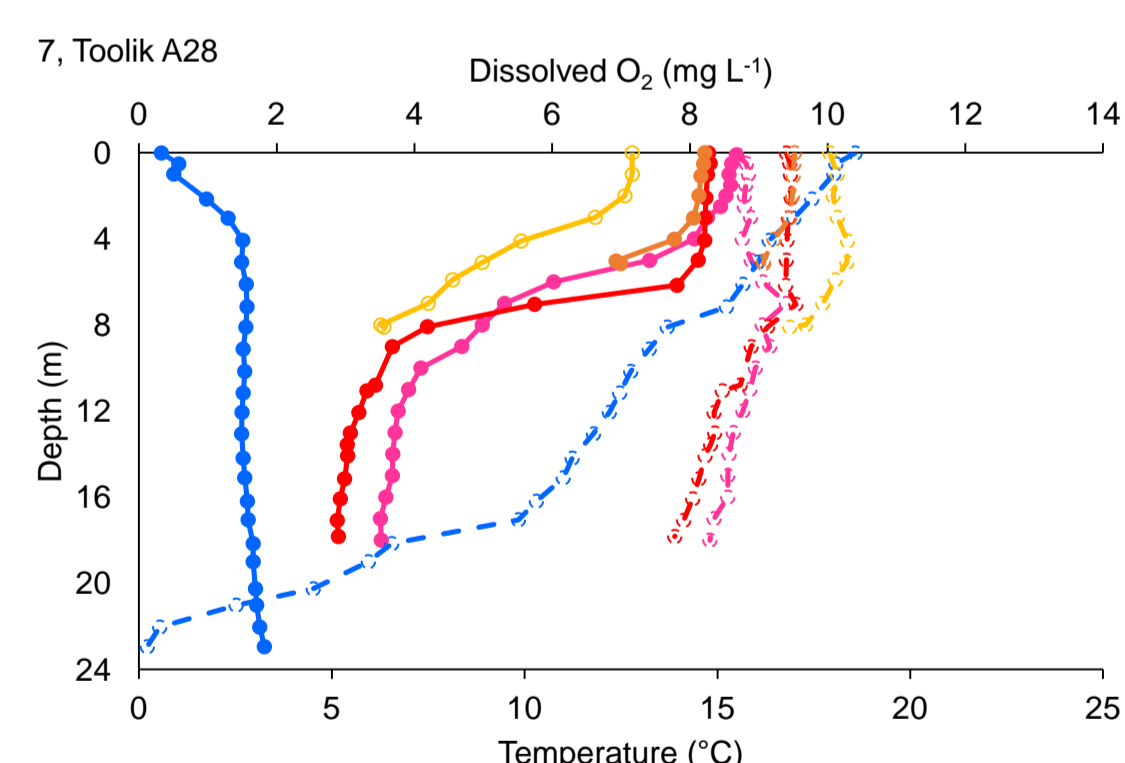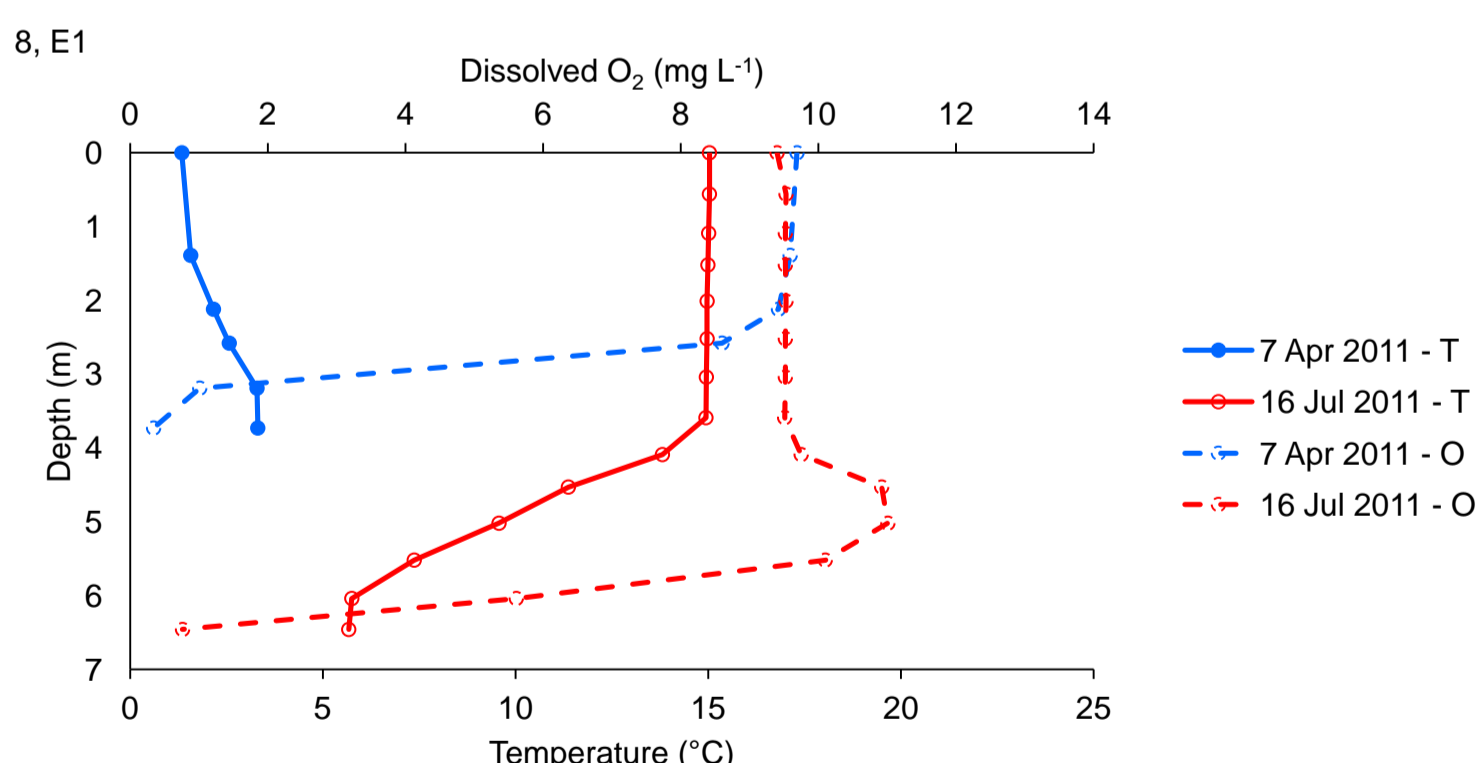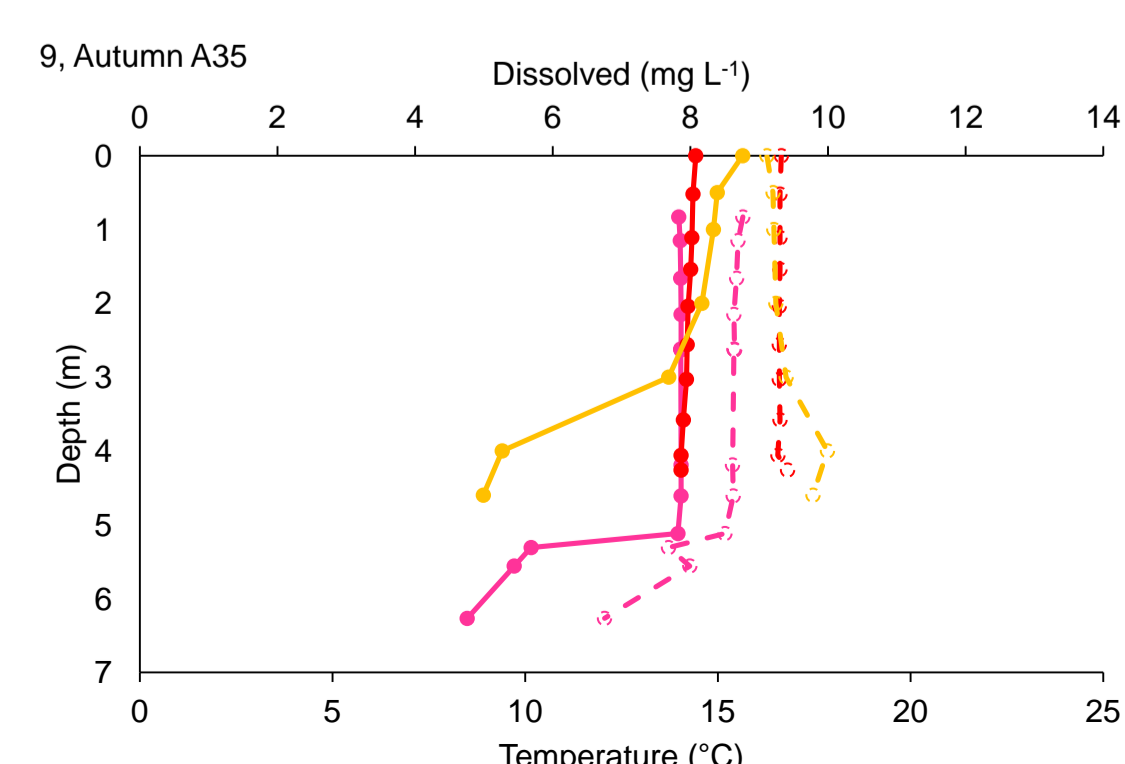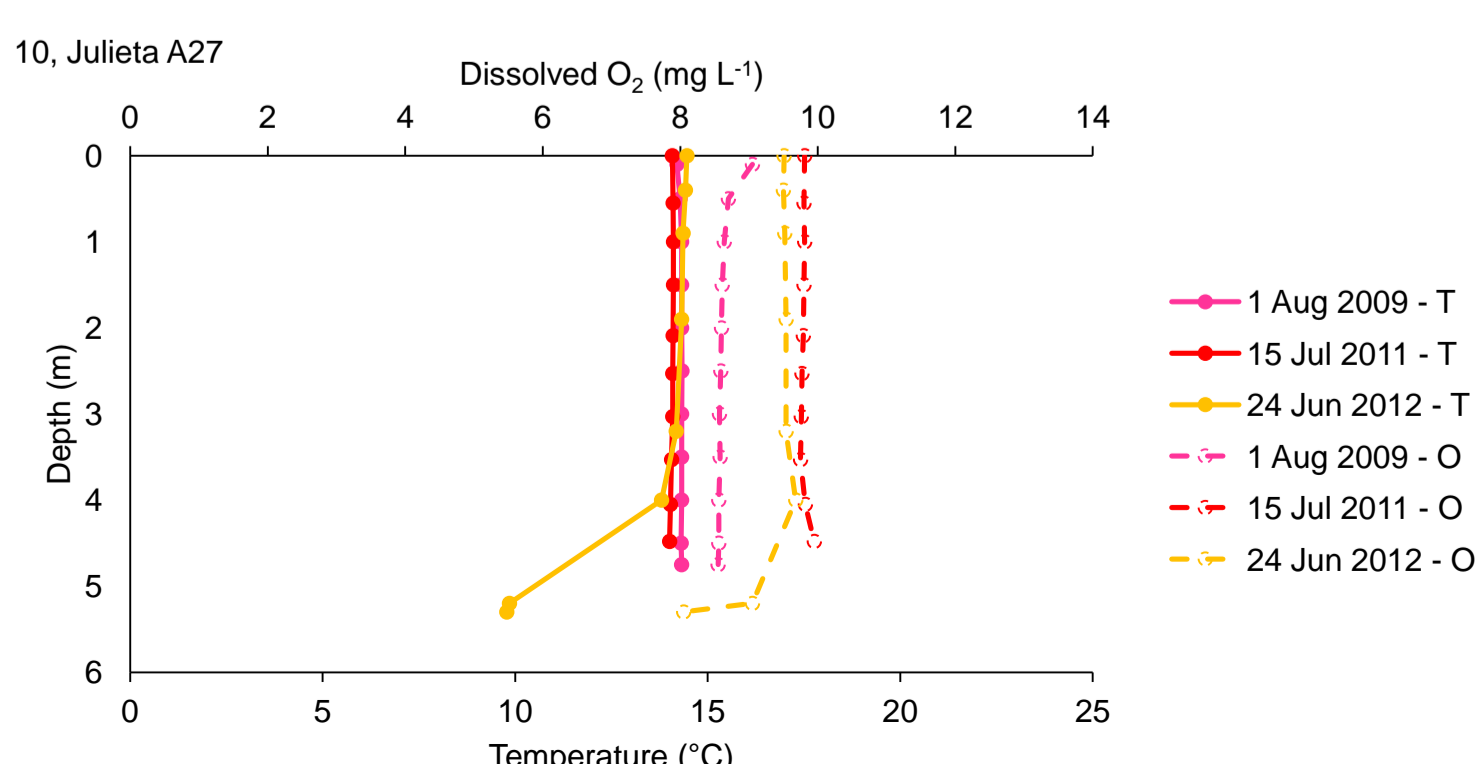

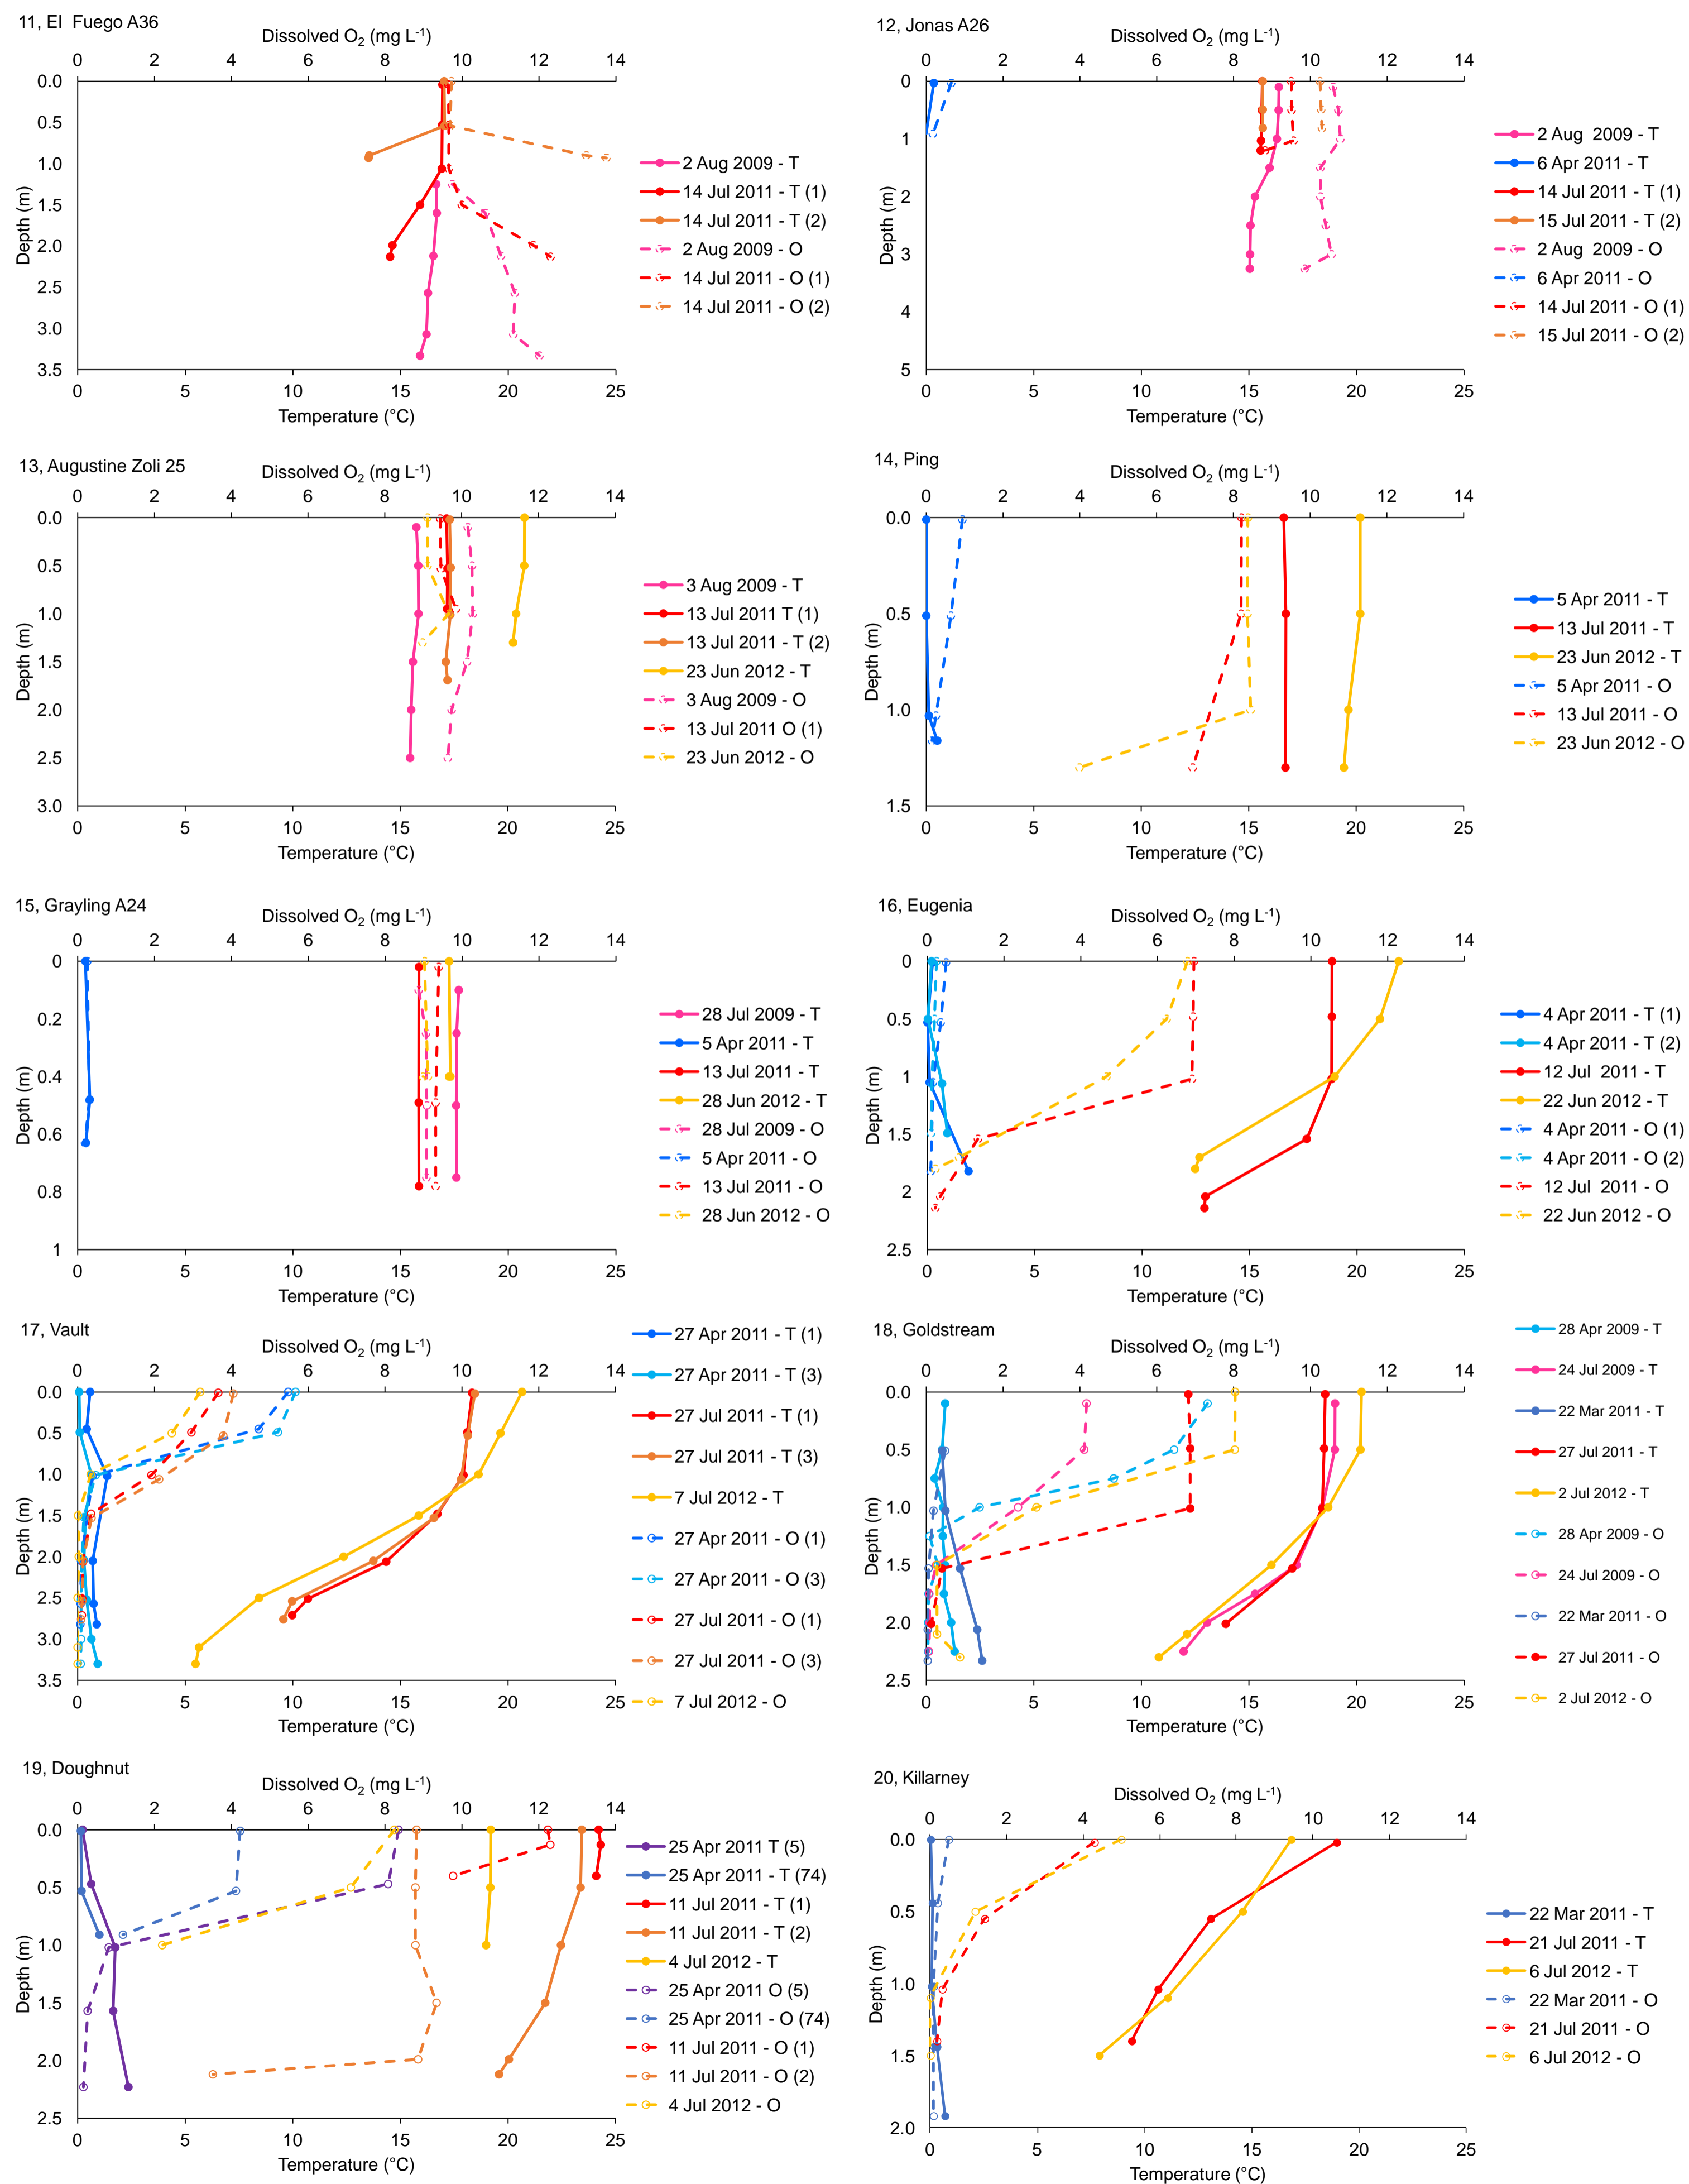

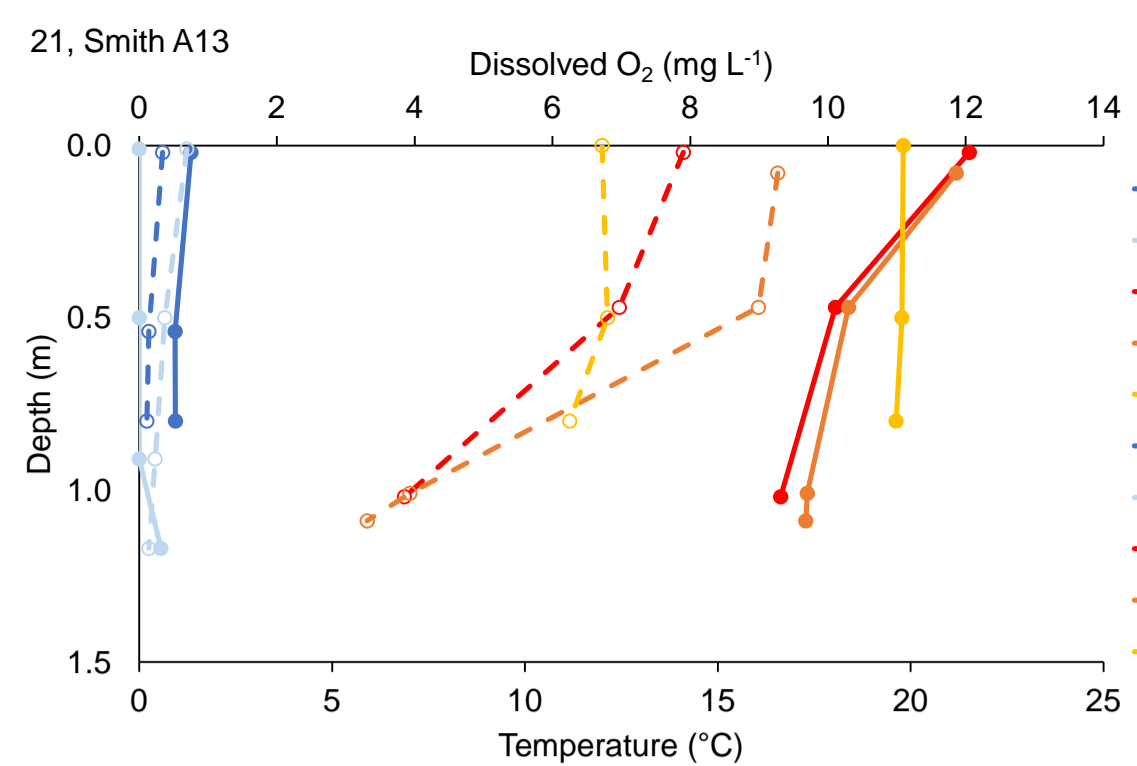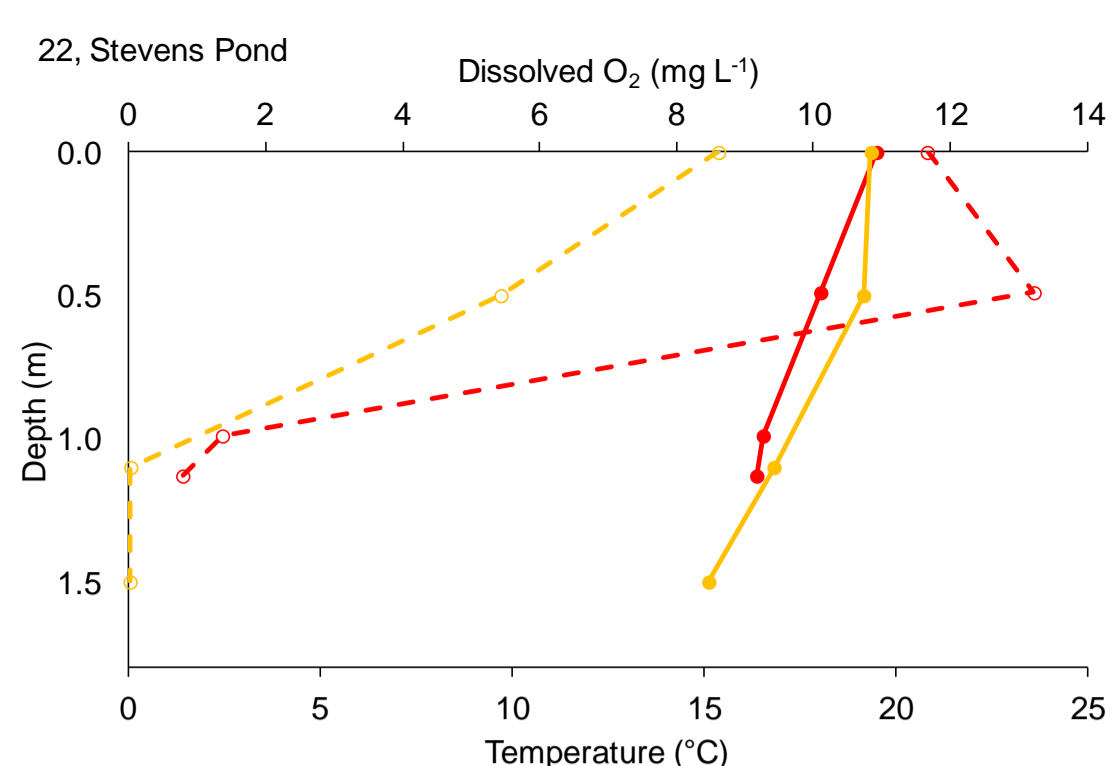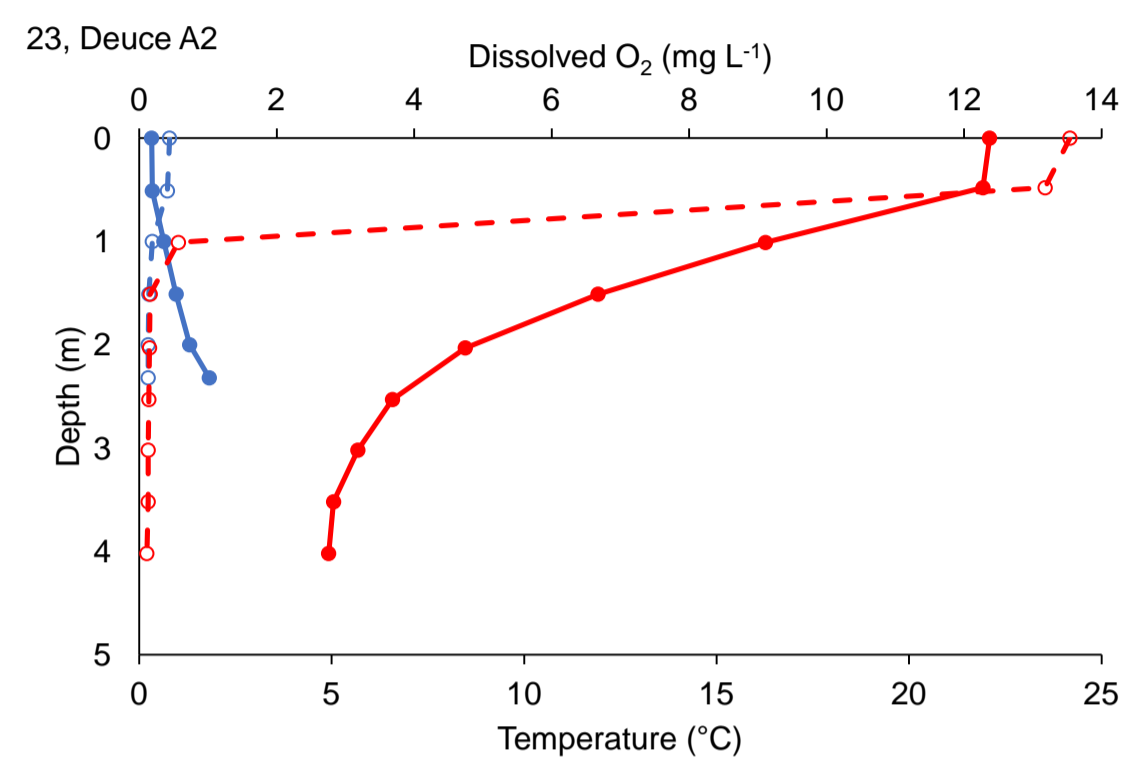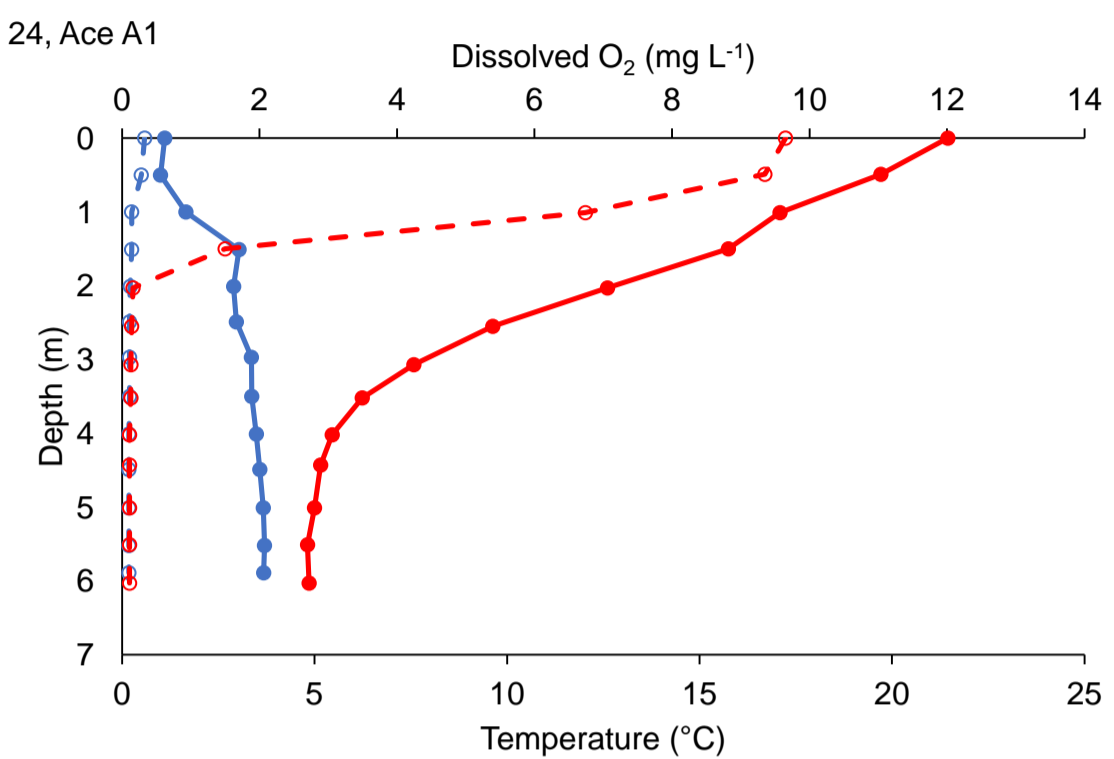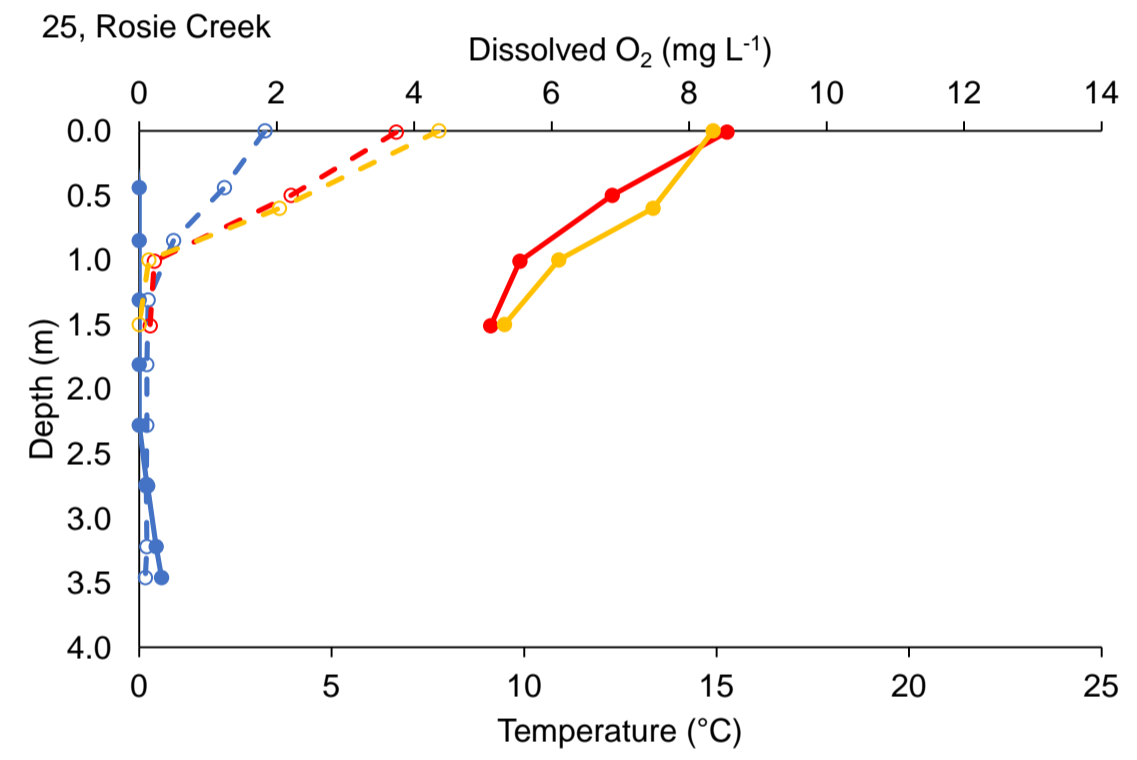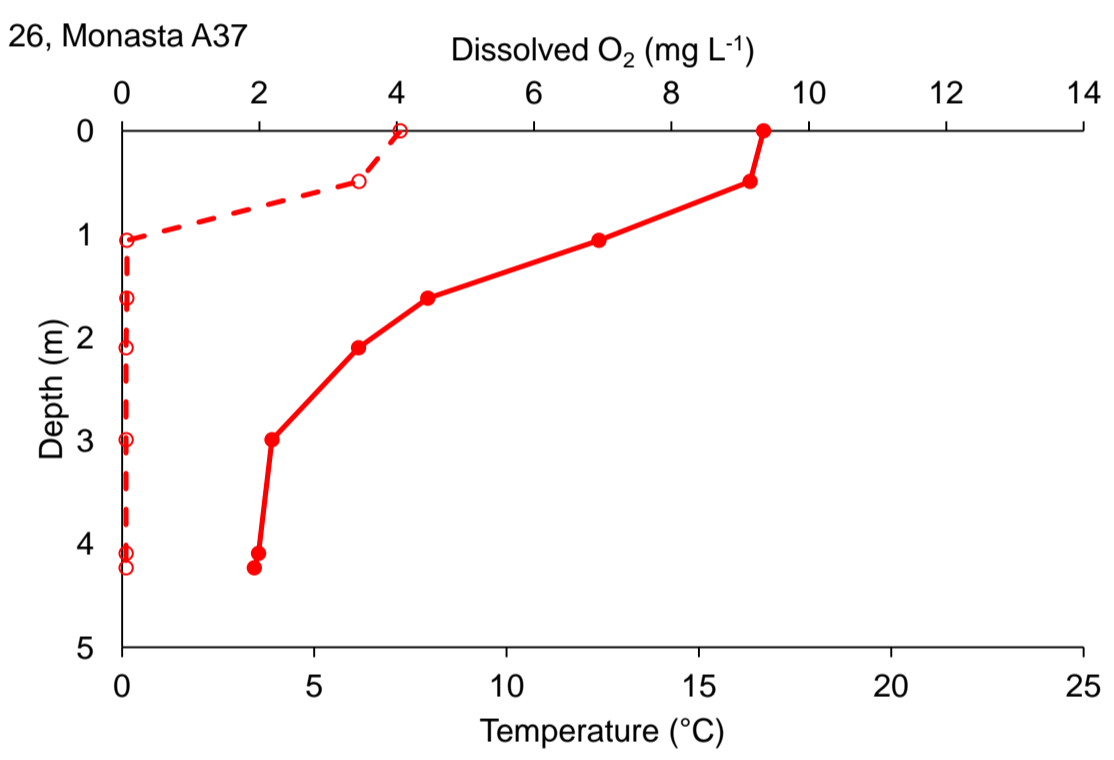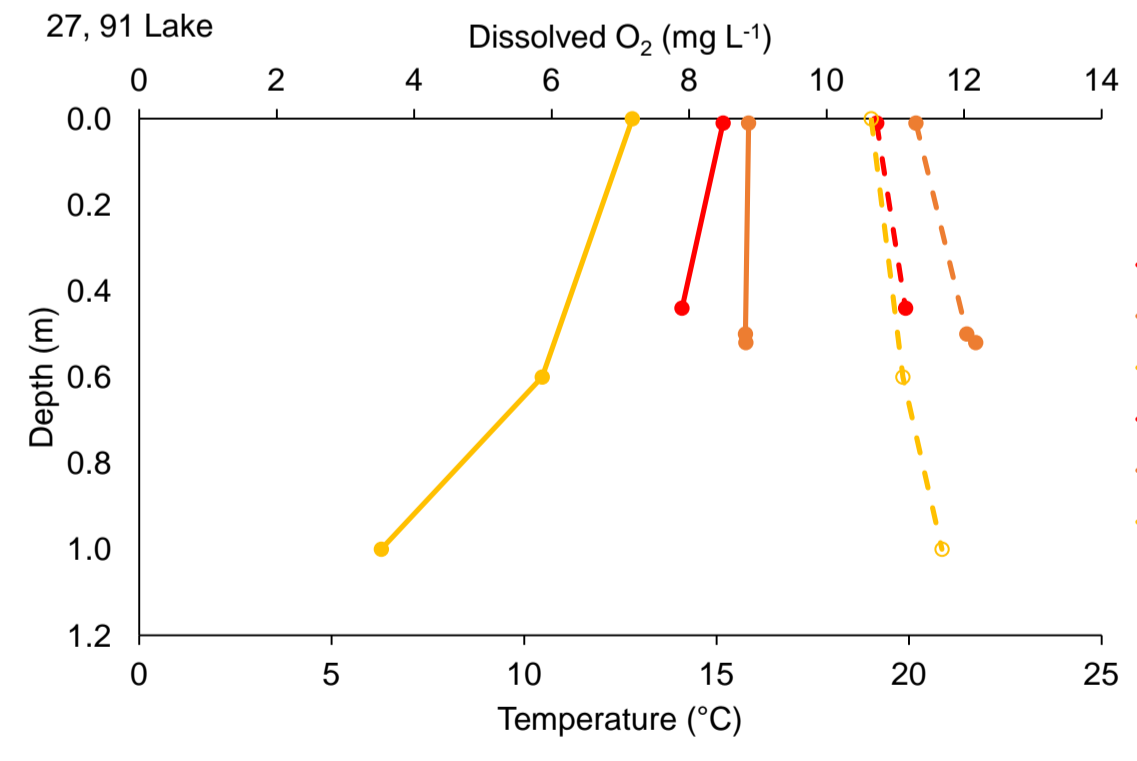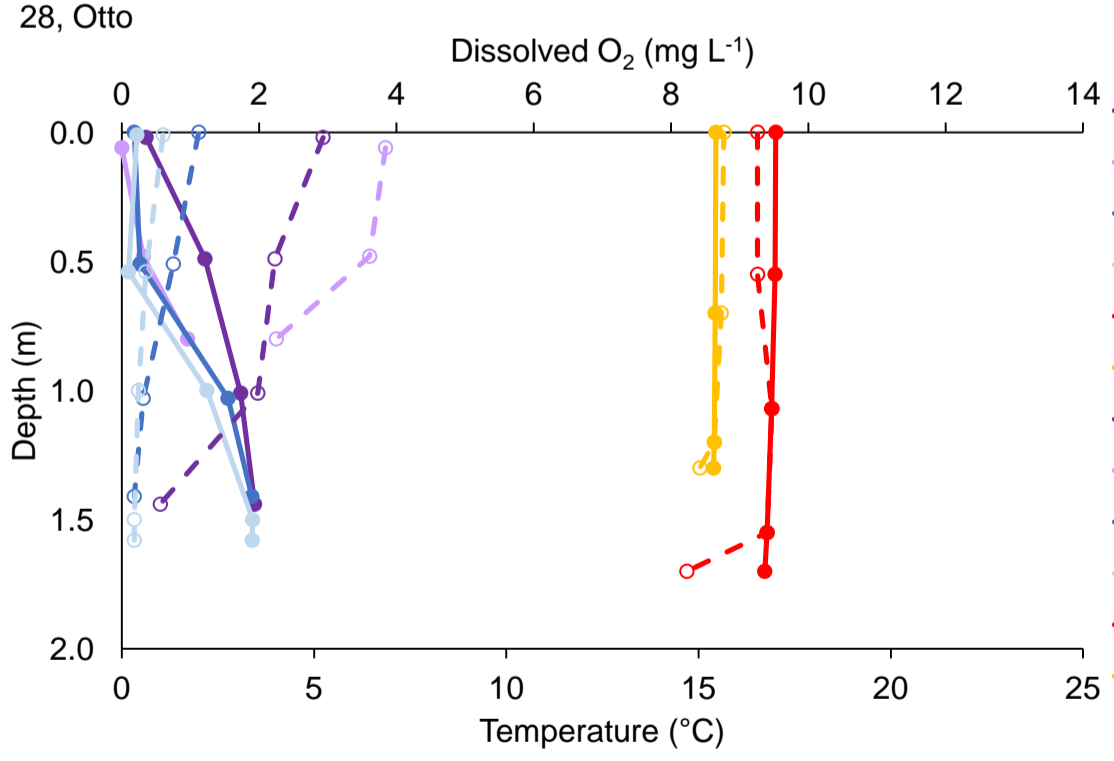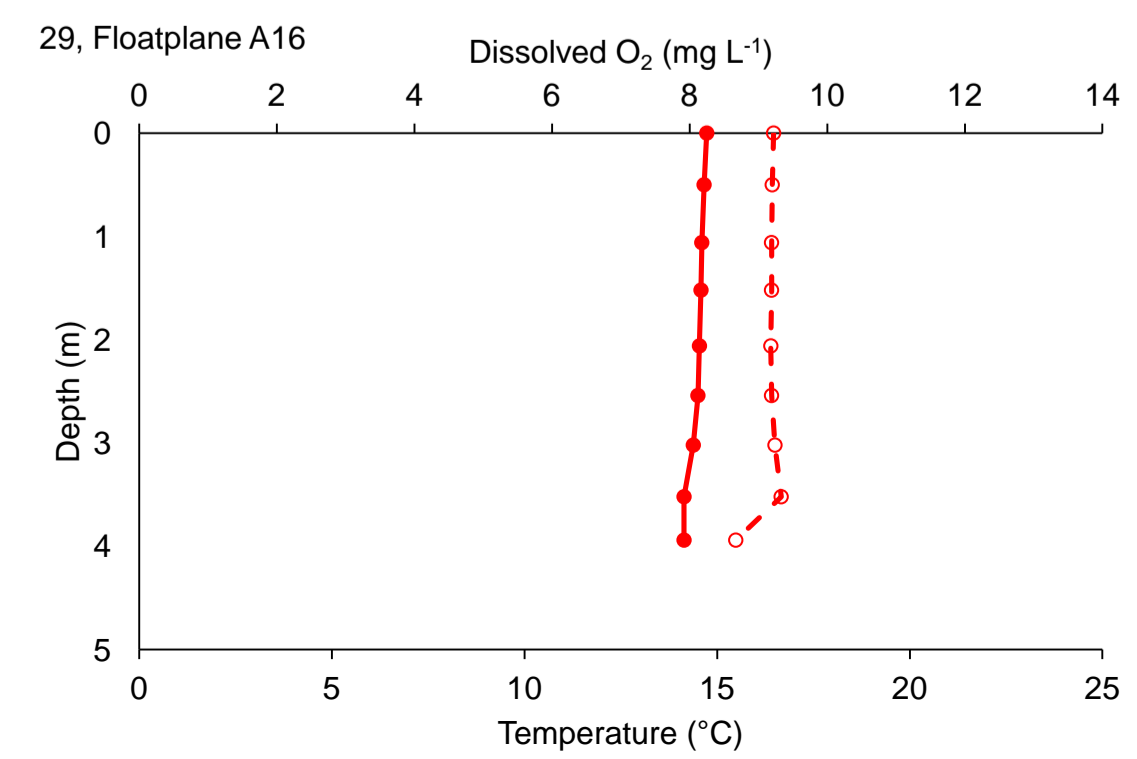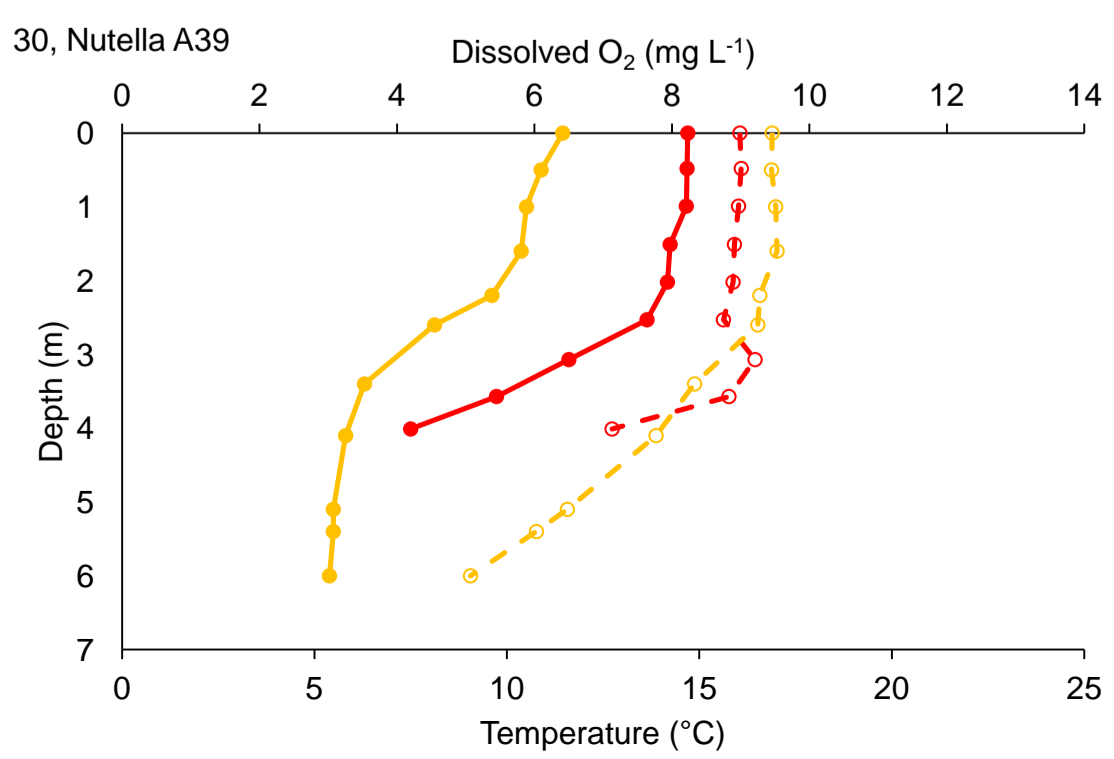

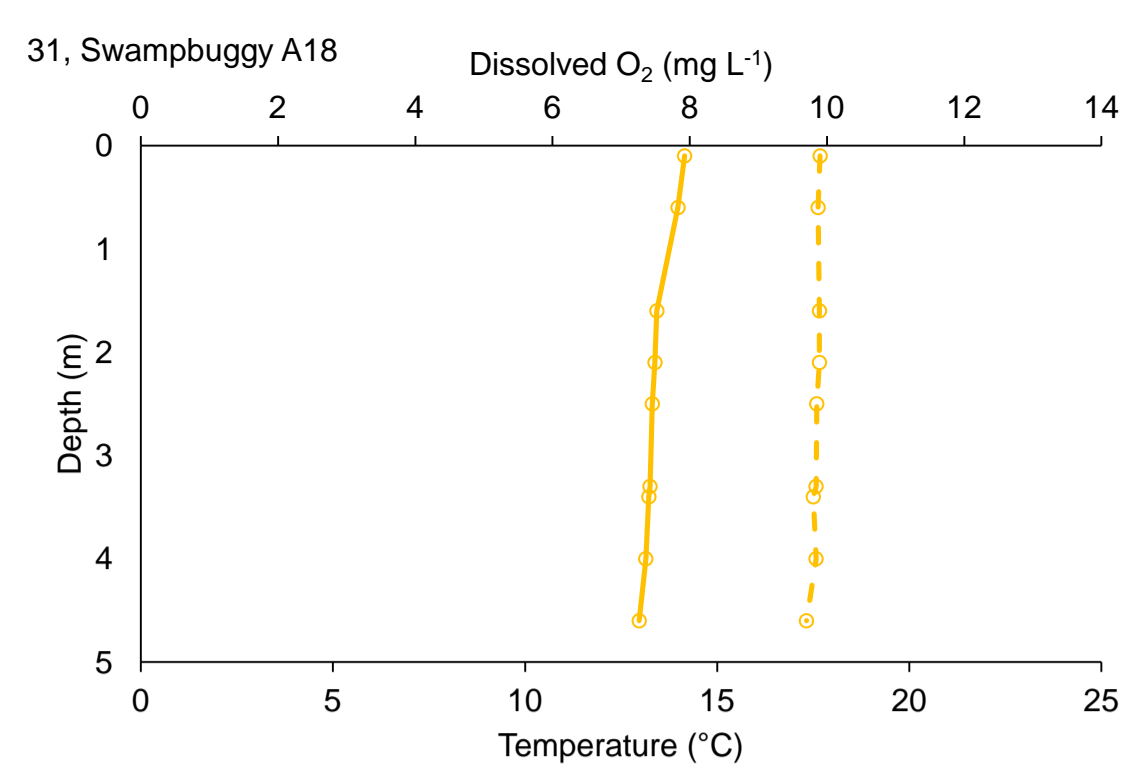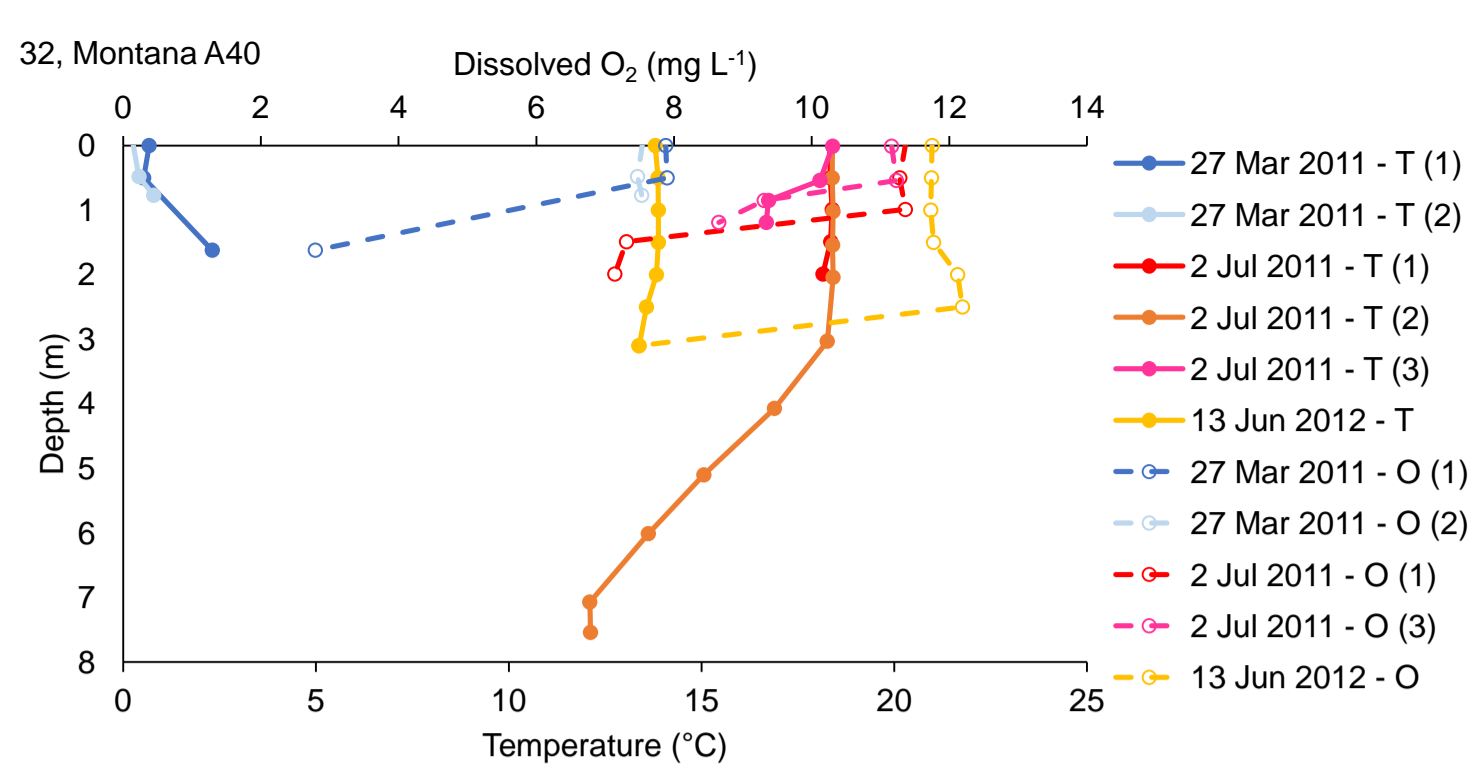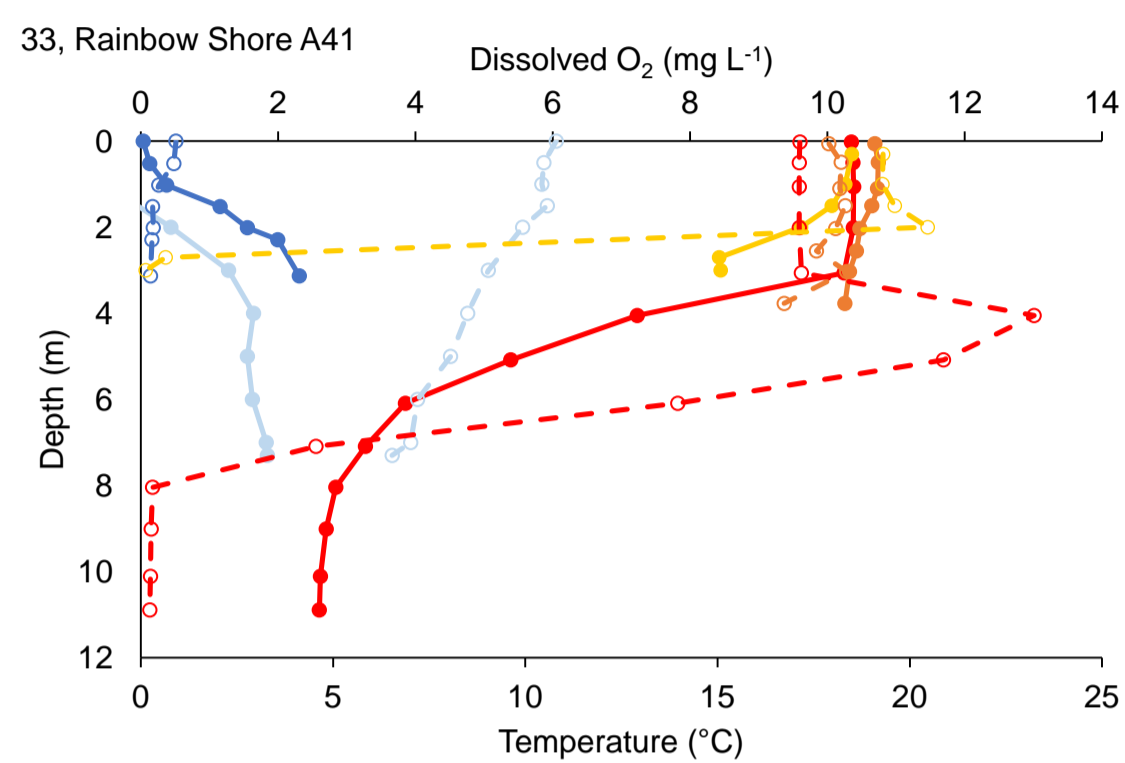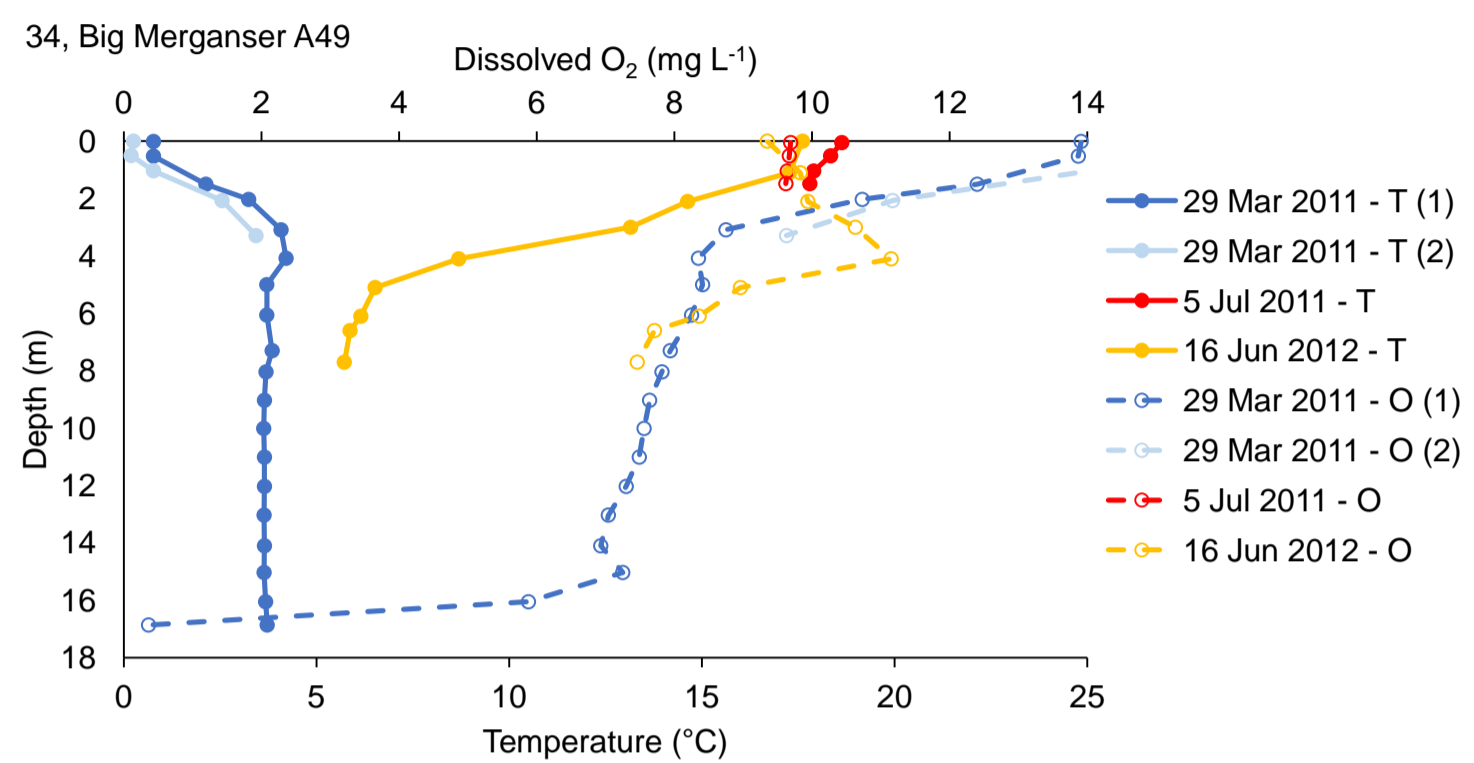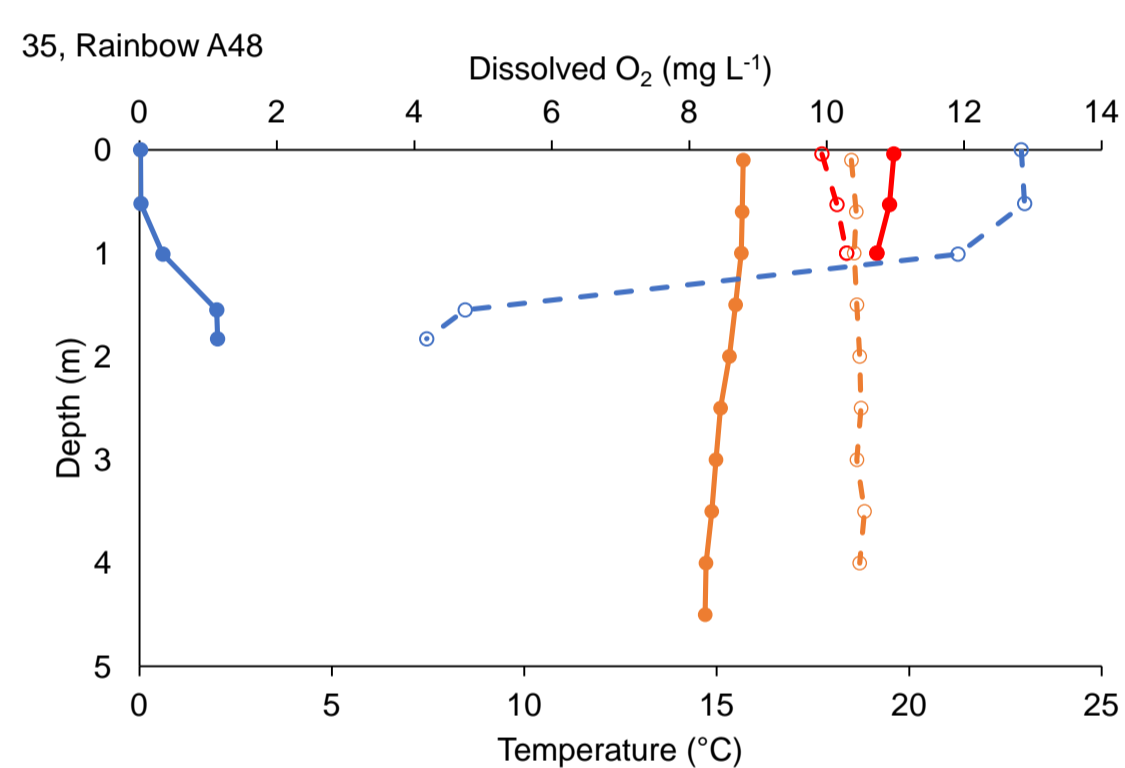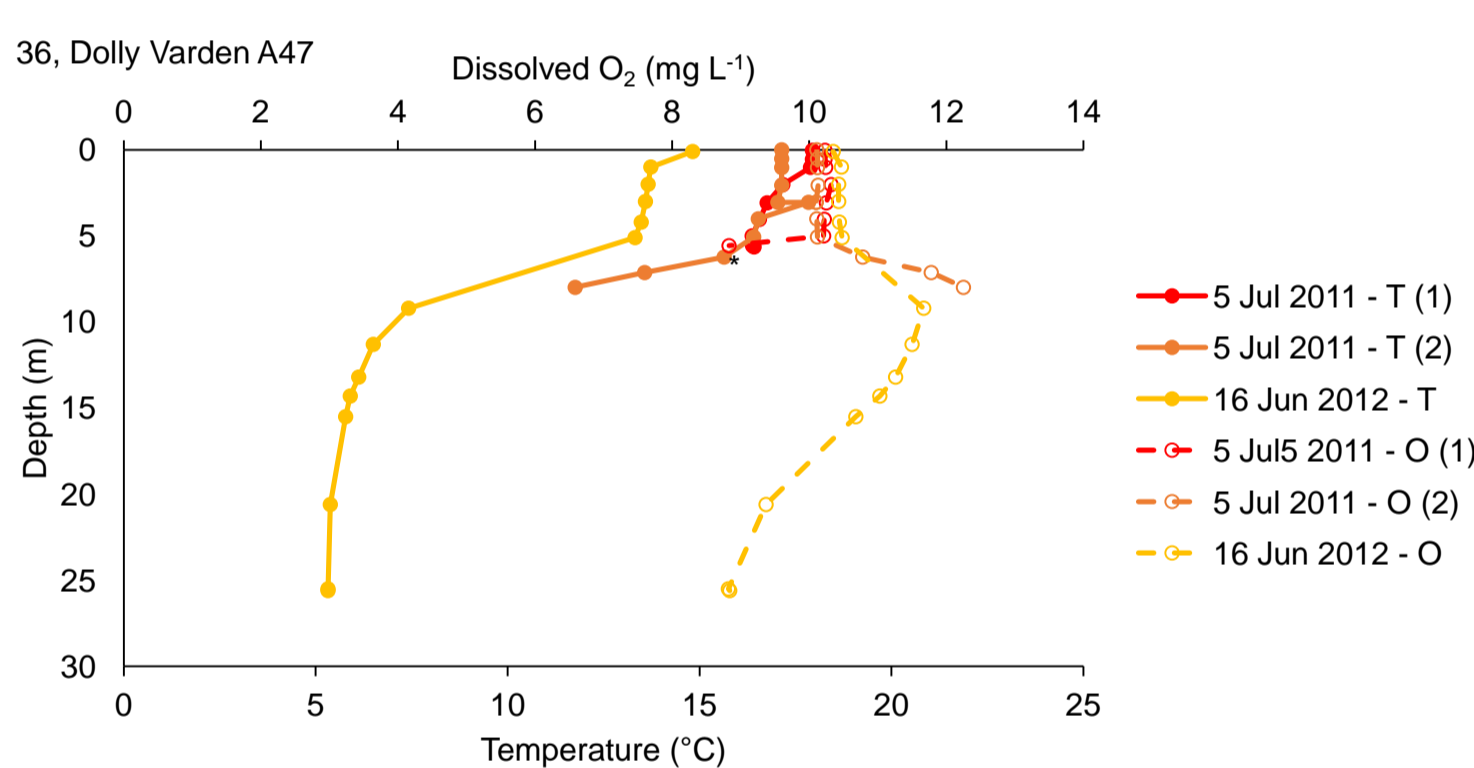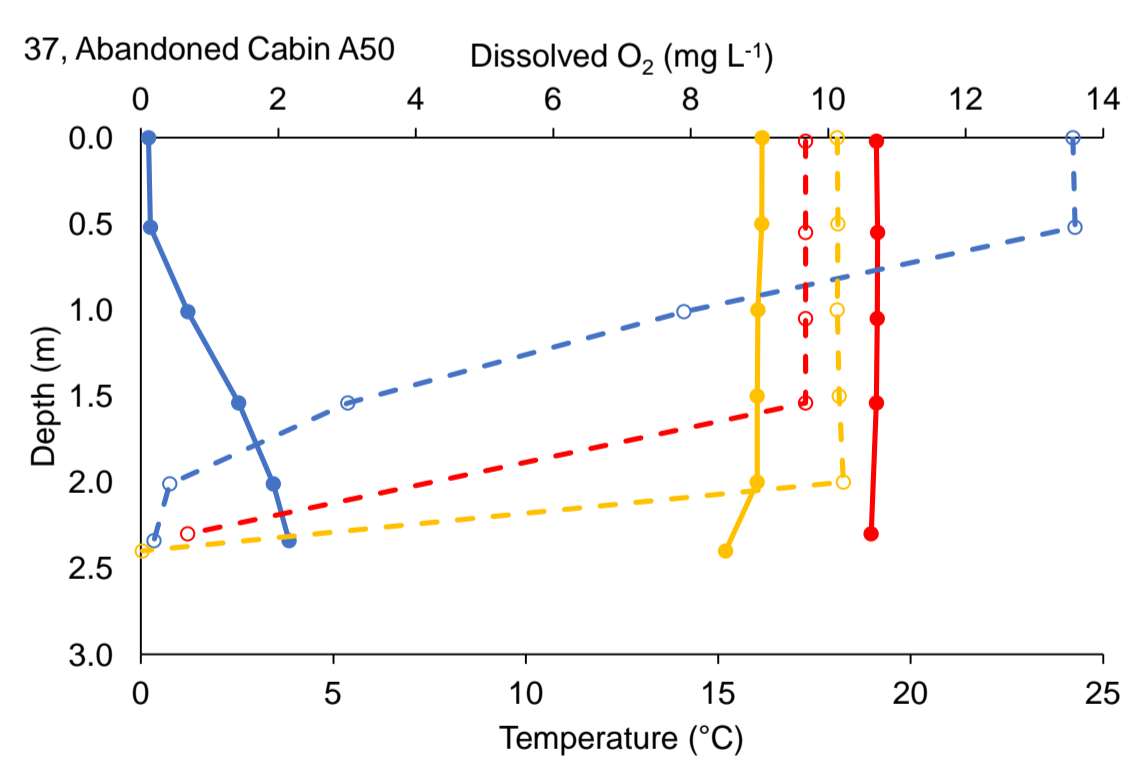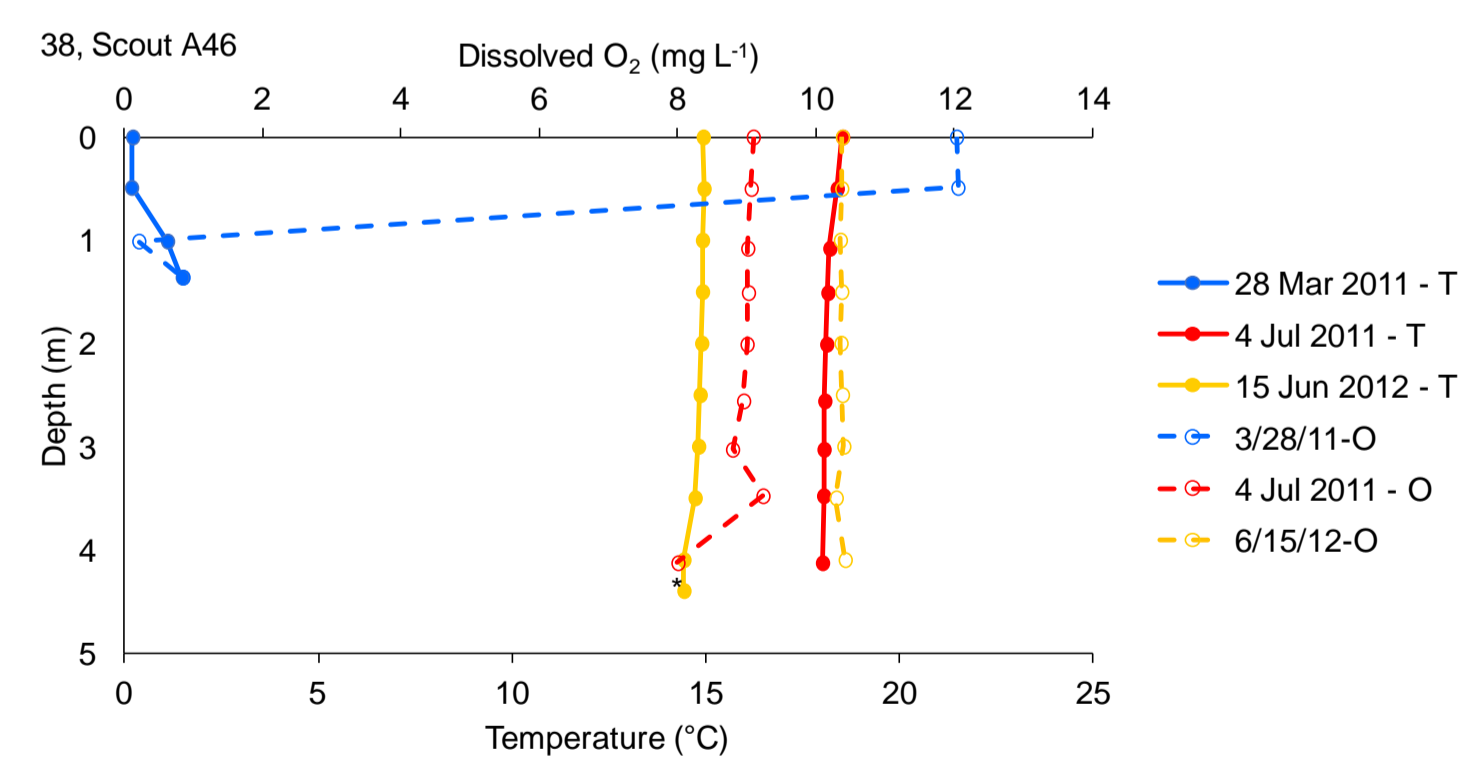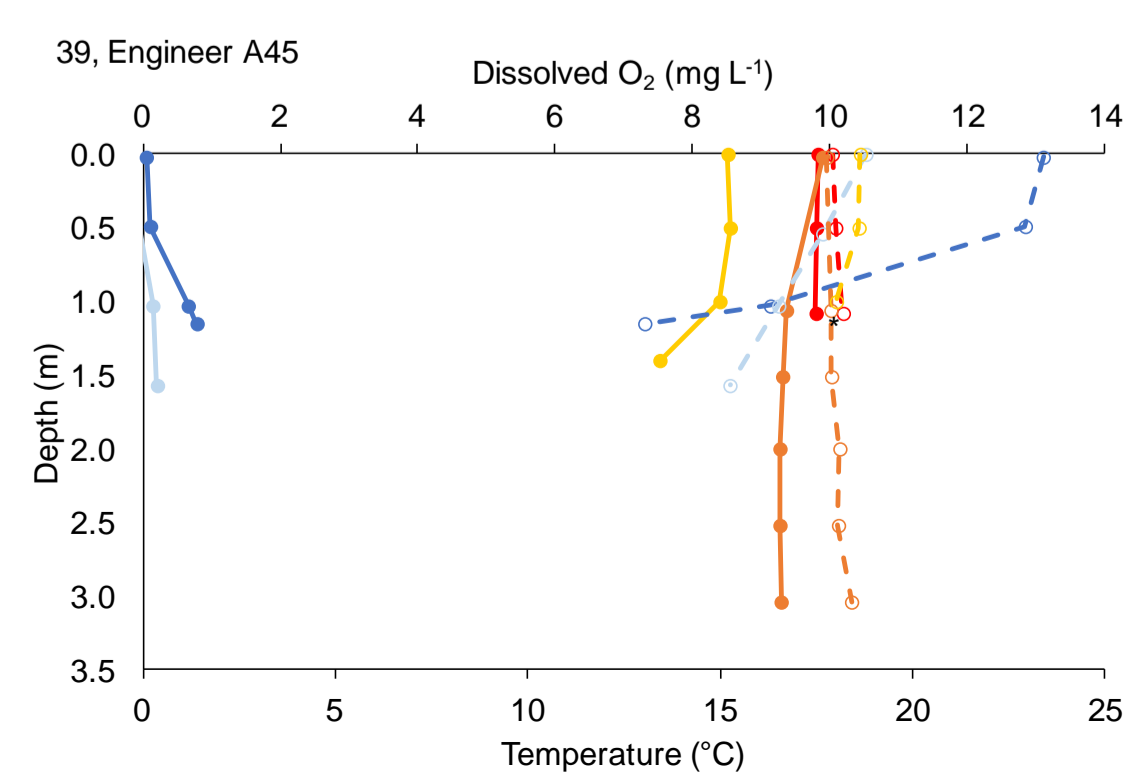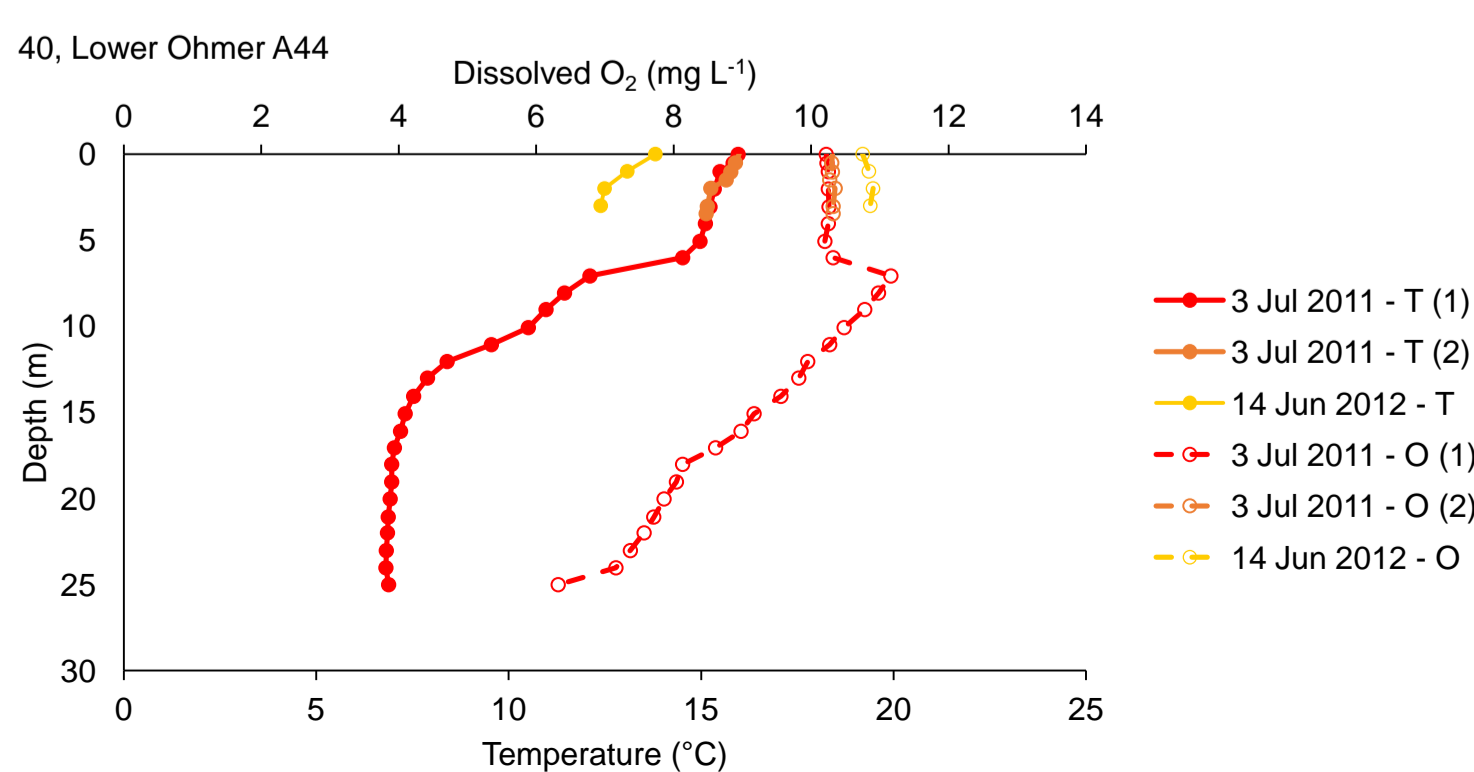

Supplement: Supplementary file 1 [file bg-12-3197-2015-supplement.pdf]
